# Supplementary material
Source: publisher figshare collection journal article supplement (https://asha.figshare.com/ndownloader/files/11160677)
Supplement: Supplementary file 1 [file 11160677]

**Supplemental Appendix.** Case example of Nuffield Dyspraxia Programme–Third Edition (NDP3; Williams & Stephens, 2004) goals, target selection, and progression.

| Goal                                                                        | Initially selected stimuli                                                                     | Progression:<br>Within goal                                                                                                                                                                     | Progression:<br>Across goals<br>(using NDP3 hierarchy)                                                             |
|-----------------------------------------------------------------------------|------------------------------------------------------------------------------------------------|-------------------------------------------------------------------------------------------------------------------------------------------------------------------------------------------------|--------------------------------------------------------------------------------------------------------------------|
| To produce the single sounds /s/, /f/, /z/, /ʃ/, and /v/                    | /s/, /f/, /z/, /ʃ/, and /v/                                                                    | Session 6: /s/ <sup>a</sup> and /f/ <sup>a</sup><br>Added /j/<br>Session 9: /v/ <sup>a</sup> and /z/ <sup>a</sup><br>No other single sounds to add                                              | Session 6: /s/ and /f/ stepped up to CV using transitions (e.g., /f, a, fa/)<br>Session 9: /v/ and /z/ moved to CV |
| To produce CVCV words with known consonants (m, n, t, d, w) to 90% accuracy | “money,” “water,” “party,” “dinner,” and “today”                                               | Session 4: “money” <sup>a</sup><br>Added “dirty”<br>Session 7: “party” <sup>a</sup> and “dirty” <sup>a</sup><br>Added “teddy” and “tummy”<br>Session 10: “tummy” <sup>a</sup><br>Added “bottom” | None: only 4 stimuli (with SS stress) met criterion and more sequences work on (particularly SW and WS stress)     |
| To produce words with CVC structure using known consonants (m, b, p, n, d)  | “bone,” “bird,” “moon,” “men,” and “nan” (starting with transitions, e.g., “bow” + n = “bone”) | Session 8: “moon” <sup>a</sup> and “men” <sup>a</sup><br>Added “pin” and “bed”                                                                                                                  | None: only 2 stimuli met criterion                                                                                 |

Note. SS = strong–strong; SW = strong–weak; WS = weak–strong.

<sup>a</sup>Once achieved, moved into maintenance where probed every second session and if accuracy decreases, it is reinstated as a treated stimulus.

**Reference**

Williams, P., & Stephens, H. (2004). *Nuffield Dyspraxia Programme–Third edition*. Windsor, England: The Miracle Factory.
